# Supplementary material for: Interventions to Promote Fundamental Movement Skills in Childcare and Kindergarten: A Systematic Review and Meta-Analysis
Source: PubMed Central journal article supplement (PMC5603621; doi:10.1007/s40279-017-0723-1), 2017-04-06

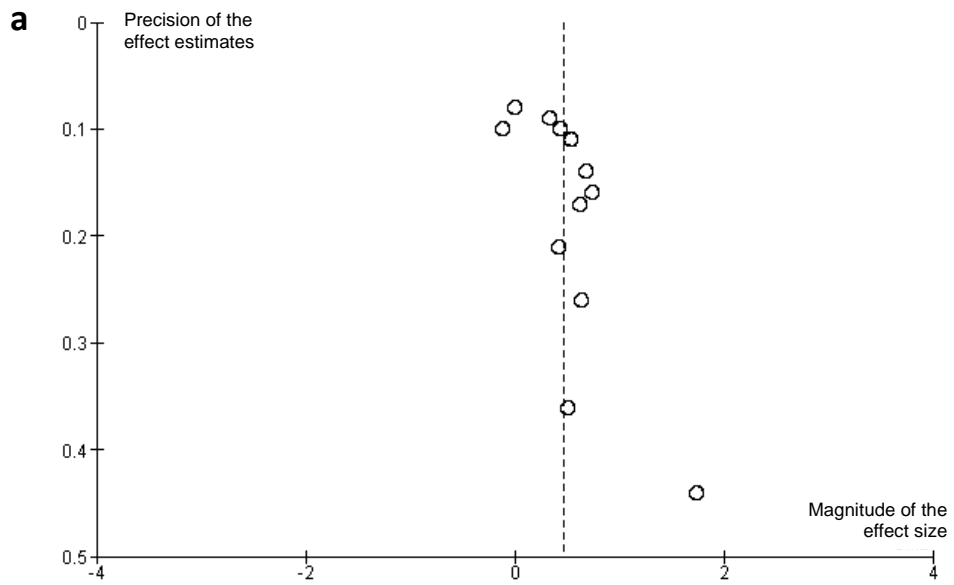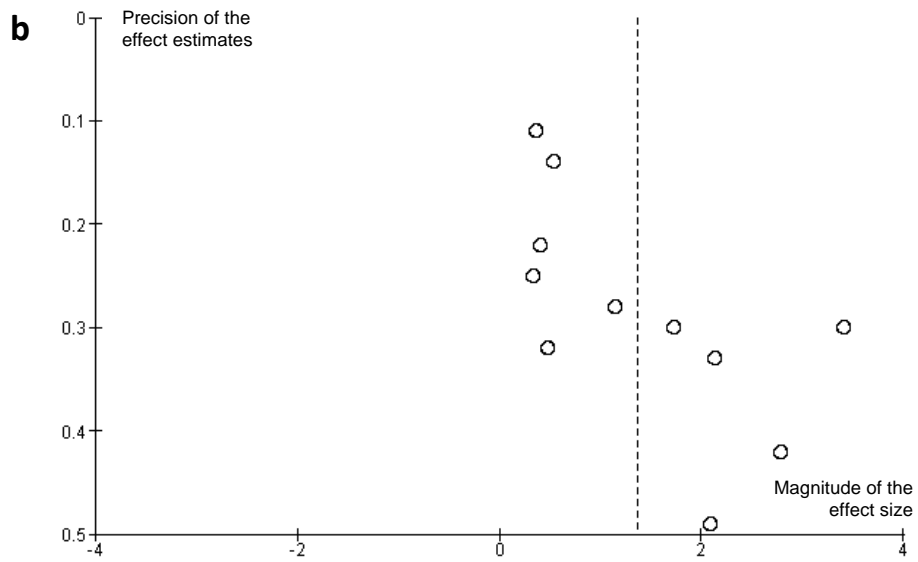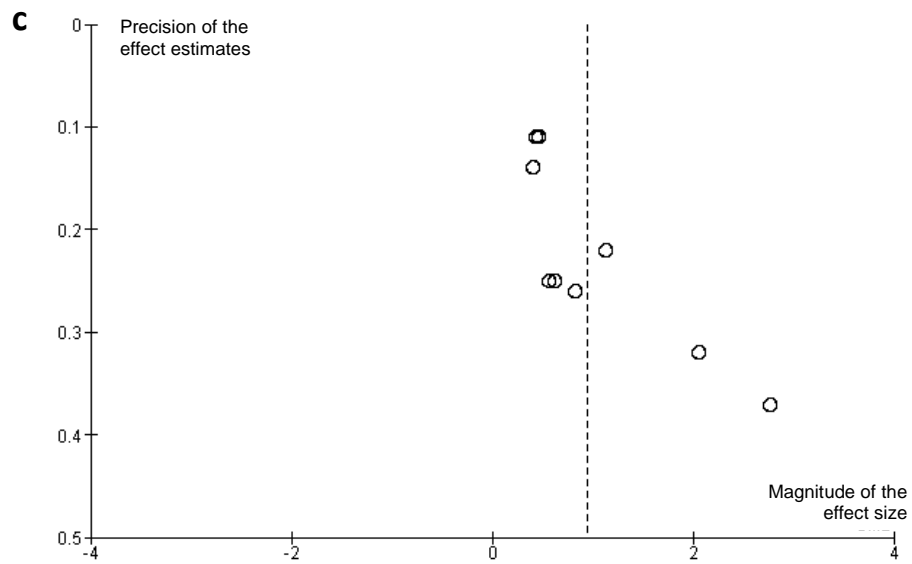

Supplement: 40279_2017_723_MOESM1_ESM.pdf [file 40279_2017_723_MOESM1_ESM.pdf]
